# Supplementary material for: One-dimensional nanostructures for flexible supercapacitors
Source: Royal Society of Chemistry journal article supplement (doi:10.1039/c5ta03467a), 2015-01-01
Supplement: c5ta03467a1.pdf [file c5ta03467a1.pdf]

Electronic Supplementary Information

# One-Dimensional Nanostructures for Flexible Supercapacitors

*Yuhang Wang,<sup>a</sup> Jiren Zeng,<sup>a</sup> Jun Li,<sup>a</sup> Xiaoqi Cui,<sup>a</sup> Abdullah M. Al-Enizi,<sup>b</sup> Lijuan Zhang,<sup>a</sup> and Gengfeng*

*Zheng,<sup>a,\*</sup>*

<sup>a</sup>Laboratory of Advanced Materials, Department of Chemistry, Collaborative Innovation Center of Chemistry for Energy Materials, Fudan University, Shanghai 200433, China

<sup>b</sup>Department of Chemistry, College of Science, King Saud University, Riyadh 11451, Saudi Arabia

\* Address correspondence to: [gfzheng@fudan.edu.cn](mailto:gfzheng@fudan.edu.cn) (G.Z.)

**Table S1.** Electrochemical performances of different 1D nanomaterials for SCs

| Material                                                                | Capacity                                         | Energy density                    | Power density                     | Cyclic stability                   | Ref |
|-------------------------------------------------------------------------|--------------------------------------------------|-----------------------------------|-----------------------------------|------------------------------------|-----|
| <b>Carbon</b>                                                           |                                                  |                                   |                                   |                                    |     |
| PAN-derived CNFs                                                        | 120 F g <sup>-1</sup> at 1 A g <sup>-1</sup>     |                                   |                                   |                                    | 57  |
| ZnCl <sub>2</sub> -containing PAN nanofibers derived CNFs               | 140 F g <sup>-1</sup>                            |                                   |                                   |                                    | 58  |
| Nafion/PAN co-electrospun nanofibers derived CNFs                       | 210 F g <sup>-1</sup> at 1 A g <sup>-1</sup>     | 4 W h kg <sup>-1</sup>            | 20 kW kg <sup>-1</sup>            | No obvious decay after 500 cycles  | 62  |
| PVA/phenolic resin based CNFs                                           | 200 F g <sup>-1</sup> at 1 A g <sup>-1</sup>     |                                   |                                   | Over 92% after 1000 cycles         | 63  |
| PPy coated and N-doped CNFs                                             | 202 F g <sup>-1</sup> at 1 A g <sup>-1</sup>     | 7.11 W h kg <sup>-1</sup> (Max.)  | 89.57 kW kg <sup>-1</sup> (Max.)  | ~97% after 3000 cycles             | 66  |
|                                                                         |                                                  |                                   |                                   |                                    | 41  |
| Bacterial cellulose derived CNFs                                        | 77.76 F g <sup>-1</sup> at 1 A g <sup>-1</sup>   | 32.91 W h kg <sup>-1</sup> (Max.) | 284.63 kW kg <sup>-1</sup> (Max.) | ~95.4% after 2000 cycles           | 42  |
| Bacterial cellulose derived N-doped CNFs                                | 186.6 F g <sup>-1</sup> at 1 A g <sup>-1</sup>   | 6.07 W h kg <sup>-1</sup> (Max.)  | 390.53 kW kg <sup>-1</sup> (Max.) | 95.9% after 5000 cycles            | 43  |
| Bacterial cellulose derived N, P hetero-atom doped CNFs                 | 204.9 F g <sup>-1</sup> at 1 A g <sup>-1</sup>   | 7.76 W h kg <sup>-1</sup>         | 186.03 kW kg <sup>-1</sup> (Max.) | No obvious decay after 4000 cycles | 67  |
| <b>Metal oxides and hydroxides</b>                                      |                                                  |                                   |                                   |                                    |     |
| WO <sub>3-x</sub> @Au@MnO <sub>2</sub> nanowires                        | 1195 F g <sup>-1</sup> at 0.75 A g <sup>-1</sup> | 78.1 W h kg <sup>-1</sup>         | 36 kW kg <sup>-1</sup>            | No obvious decay after 5000 cycles | 68  |
| Mesoporous NiCo <sub>2</sub> O <sub>4</sub> nanowire on carbon textiles | 1283 F g <sup>-1</sup> at 1 A g <sup>-1</sup>    |                                   |                                   | 57% after 5000 cycles              | 70  |
| Ni(OH) <sub>2</sub> nanowires                                           | 270 F g <sup>-1</sup> at 7.5 A g <sup>-1</sup>   |                                   |                                   |                                    | 71  |
| CNT films supported electrodeposited MnO <sub>2</sub> nanowires         | 300 F g <sup>-1</sup> at 0.77 A g <sup>-1</sup>  |                                   |                                   | Over 88% after 3000 cycles         | 75  |
| MnO <sub>2</sub> nanowires/graphene nanocomposites                      | 31.0 F g <sup>-1</sup> at 0.5 A g <sup>-1</sup>  | 7 W h kg <sup>-1</sup>            | 5 kW kg <sup>-1</sup>             | 79% after 1000 cycles              | 76  |
| MnO <sub>2</sub> nanorods on carbon textiles                            | 109 mF cm <sup>-2</sup>                          | 71 W h kg <sup>-1</sup>           | 39 kW kg <sup>-1</sup>            |                                    | 77  |
| MnO <sub>2</sub> /PEDOT coaxial nanowires                               | 210 F g <sup>-1</sup> at 5 mA cm <sup>-1</sup>   |                                   |                                   |                                    | 78  |
| α-Fe <sub>2</sub> O <sub>3</sub> /MnO <sub>2</sub> core/shell nanowires | 801 F g <sup>-1</sup> at 1 A g <sup>-1</sup>     | 17 W h kg <sup>-1</sup>           | 30.6 kW kg <sup>-1</sup>          | 98.5% after 1500 cycles            | 79  |
| Zn <sub>2</sub> SnO <sub>4</sub> /MnO <sub>2</sub> core/shell nanocable | 642.4 F g <sup>-1</sup> at 1 A g <sup>-1</sup>   | 36.8 W h kg <sup>-1</sup>         | 32 kW kg <sup>-1</sup>            | 98.8% after 1000 cycles            | 80  |
| CuO@MnO <sub>2</sub>                                                    | 49.2 F g <sup>-1</sup> at 0.25 A g <sup>-1</sup> | 22.1 W h kg <sup>-1</sup>         | 85.6 kW kg <sup>-1</sup>          | 101.5% after                       | 81  |

|                                                                                                                  |                                                           |                             |                                     |                                |    |
|------------------------------------------------------------------------------------------------------------------|-----------------------------------------------------------|-----------------------------|-------------------------------------|--------------------------------|----|
| core-shell architectures                                                                                         | $\text{g}^{-1}$                                           | (Max.)                      | (Max.)                              | 10000 cycles                   |    |
| $\text{Co}_3\text{O}_4$ nanowire@ $\text{MnO}_2$                                                                 | $0.56 \text{ F cm}^{-2}$ at<br>$11.25 \text{ mA cm}^{-2}$ |                             |                                     | 97.3% after 5000<br>cycles     | 56 |
| $\text{Co}_3\text{O}_4$ @Pt@<br>$\text{MnO}_2$ nanowire arrays                                                   | $539 \text{ F g}^{-1}$ at $1 \text{ A g}^{-1}$            | $39.6 \text{ W h kg}^{-1}$  | $19.6 \text{ kW kg}^{-1}$           | 105.6% after 5000<br>cycles    | 82 |
| ZnO core-shell<br>nanocables                                                                                     | $1260.9 \text{ F g}^{-1}$                                 | $0.04 \text{ mW h cm}^{-3}$ | $2.44 \text{ mW cm}^{-3}$           | 87.5% after 10000<br>cycles    | 45 |
| H-TiO <sub>2</sub> @ $\text{MnO}_2$ core-<br>shell nanowires                                                     | $449.6 \text{ F g}^{-1}$ at 10<br>$\text{mV s}^{-1}$      |                             |                                     |                                | 74 |
| Worm-like amorphous<br>$\text{MnO}_2$ nanowires grown<br>on textiles                                             | $334.7 \text{ F g}^{-1}$ at $1 \text{ A g}^{-1}$          | $6.3 \text{ W h kg}^{-1}$   | $20.4 \text{ kW kg}^{-1}$<br>(Max.) | 83% after 1000<br>cycles       | 83 |
| $\text{MnO}_2$ and<br>$\text{M}(\text{OH})_2/\text{MnO}_2$<br>nanofiber/nanowires                                | $298 \text{ F g}^{-1}$ at $50 \text{ mV s}^{-1}$          |                             |                                     | 85.2% after 1000<br>cycles     | 84 |
| $\text{MnO}_2/\text{Mn}/\text{MnO}_2$<br>sandwich-structured<br>nanotube arrays                                  | $955 \text{ F g}^{-1}$ at $1.5 \text{ A g}^{-1}$          | $45 \text{ W h kg}^{-1}$    | $23 \text{ kW kg}^{-1}$             | 95% after 3000<br>cycles       | 85 |
| 3D $\text{CoO}$ @Polypyrrole<br>nanowire array                                                                   | $2223 \text{ F g}^{-1}$                                   | $11.8 \text{ W h kg}^{-1}$  | $5.5 \text{ kW kg}^{-1}$            | 99.8% after 2000<br>cycles     | 88 |
| Mesoporous $\text{CoO}$<br>nanowires                                                                             | $1525 \text{ F g}^{-1}$ at $1 \text{ A g}^{-1}$           | $81 \text{ W h kg}^{-1}$    | $71 \text{ kW kg}^{-1}$             | ~91-94% after<br>5000 cycles   | 89 |
| Reduced mesoporous<br>$\text{Co}_3\text{O}_4$ nanowires                                                          | $978 \text{ F g}^{-1}$ at $2 \text{ A g}^{-1}$            |                             |                                     | Over 90% after<br>2000 cycles  | 90 |
| $\text{Co}_3\text{O}_4/\text{NiO}$ core/shell<br>nanowire arrays                                                 | $853 \text{ F g}^{-1}$ at $2 \text{ A g}^{-1}$            |                             |                                     | 95.1% after 6000<br>cycles     | 91 |
| $\text{CoNiO}_2/\text{TiN}-\text{TiO}_x\text{N}_y$<br>composites                                                 | $3181 \text{ F g}^{-1}$ at $2 \text{ mA cm}^{-2}$         | $6.21 \text{ W h kg}^{-1}$  | $2.21 \text{ kW kg}^{-1}$           | About 83% after<br>3000 cycles | 47 |
| Single-crystalline<br>$\text{NiCo}_2\text{O}_4$ nanoneedle<br>arrays                                             | $1118.6 \text{ F g}^{-1}$                                 |                             |                                     | 89.4% after 2000<br>cycles     | 93 |
| Ni-Co hydroxide<br>nanosheets coated on<br>$\text{NiCo}_2\text{O}_4$ nanowires<br>grown on carbon fiber<br>paper | $1.64 \text{ F cm}^{-2}$ at $2 \text{ mA cm}^{-2}$        | $33 \text{ W h kg}^{-1}$    | $41.25 \text{ kW kg}^{-1}$          | 81.3% after 2000<br>cycles     | 95 |
| $\text{Fe}_2\text{O}_3$ nanotubes                                                                                | $180.4 \text{ F cm}^{-1}$ at $1 \text{ mA cm}^{-2}$       |                             |                                     |                                | 16 |
| Oxygen-deficient<br>hematite nanorods                                                                            | $277.3 \text{ mF cm}^{-2}$ at $10 \text{ mVs}^{-1}$       |                             |                                     | 95.2% after 10000<br>cycles    | 72 |
| $\text{Fe}_2\text{O}_3$ nanorods on<br>graphene foam/CNT<br>hybrid film                                          | $278 \text{ mA h g}^{-1}$ at $1 \text{ A g}^{-1}$         |                             |                                     | 96% after 1000<br>cycles       | 29 |
| CNT/ $\text{V}_2\text{O}_5$ nanowire                                                                             | $\sim 500 \text{ C g}^{-1}$ at $1 \text{ mV s}^{-1}$      |                             |                                     |                                | 24 |
| $\text{WO}_{3-x}/\text{MoO}_{3-x}$ core/shell<br>nanowires on carbon<br>fabric                                   | $500 \text{ mF cm}^{-2}$ ,                                |                             |                                     |                                | 73 |

**Metal chalcogenides and nitrides**

|                                                                              |                                                   |                                                |                               |                          |     |
|------------------------------------------------------------------------------|---------------------------------------------------|------------------------------------------------|-------------------------------|--------------------------|-----|
| Ni <sub>3</sub> S <sub>2</sub> /CNT                                          | 514 F g <sup>-1</sup> at 4 A g <sup>-1</sup>      |                                                |                               | 88% after 1500 cycles    | 98  |
| Co <sub>9</sub> S <sub>8</sub> nanorod arrays grown on carbon textiles       | 2.35 F cm <sup>-2</sup> at 5 mV s <sup>-1</sup>   |                                                |                               |                          | 25  |
| Ni-Co sulfide nanowires grown on Ni foam                                     | 2415 F g <sup>-1</sup> at 2.5 mA cm <sup>-2</sup> |                                                |                               | 78.5% after 3000 cycles  | 99  |
| NiCo <sub>2</sub> S <sub>4</sub> nanotube arrays grown on carbon fiber paper | 2.86 F cm <sup>-2</sup> at 4 mA cm <sup>-2</sup>  |                                                |                               | 96% after 2000 cycles    | 100 |
| Three-dimensional CoSe <sub>2</sub> /carbon cloth                            | 332 mF cm <sup>-2</sup> at 1 mA cm <sup>-2</sup>  | 0.588 mW h cm <sup>-3</sup>                    | 0.282 W cm <sup>-3</sup>      | 95.4% after 5000 cycles  | 101 |
| Hollow Co <sub>0.85</sub> Se nanowire array on carbon fiber paper            | 674 F g <sup>-1</sup> at 1.48 A g <sup>-1</sup>   | 6×10 <sup>-5</sup> W h cm <sup>-2</sup> (Max.) |                               | 89% after 2000 cycles    | 102 |
| TiN nanowire arrays                                                          | 0.33 F cm <sup>-3</sup>                           | 0.05 mW h cm <sup>-3</sup>                     | 0.3 W cm <sup>-3</sup> (Max.) | 82% after 15000 cycles   | 48  |
| Porous VN nanowire                                                           | 298.5 F g <sup>-1</sup> at 10 mV S <sup>-1</sup>  |                                                |                               | 95.3% after 10000 cycles | 103 |
| Three-dimensional arrays of VN functionalized CNTs                           | 289 F g <sup>-1</sup> at 20 mV S <sup>-1</sup>    |                                                |                               |                          | 104 |

**Polymeric materials**

|                                          |                                                       |                             |                           |                                 |     |
|------------------------------------------|-------------------------------------------------------|-----------------------------|---------------------------|---------------------------------|-----|
| PANI nanowire arrays on GO sheets        | 555 F g <sup>-1</sup> at 0.2 A g <sup>-1</sup>        |                             |                           | 92% after 2000 cycles           | 22  |
| Graphene/PANI composite film             | 385 F g <sup>-1</sup> at 0.5 A g <sup>-1</sup>        |                             |                           | 90% after 5000 cycles           | 109 |
| PANI nanorods on RGO                     | 970 F g <sup>-1</sup> at 2.5 A g <sup>-1</sup>        |                             |                           | 90% after 1700 cycles           | 110 |
| PANI nanowires/carbon cloth              | 1079 F g <sup>-1</sup>                                | 100.9 W h kg <sup>-1</sup>  | 12.1 kW kg <sup>-1</sup>  | 86% after 2100 cycles           | 111 |
| PANI nanowire array/SWCNT composites     | 410 F g <sup>-1</sup>                                 | 26.6 W h kg <sup>-1</sup>   | 7 kW kg <sup>-1</sup>     | 90% after 3000 cycles           | 112 |
| All-solid-state paperlike PANI/CNT film  | 350 F g <sup>-1</sup>                                 | 7.1 W h kg <sup>-1</sup>    | 2.189 kW kg <sup>-1</sup> | 91.9% after 1000 cycles         | 113 |
| Ultrathin free-standing SWCNT/PANI films | 236 F g <sup>-1</sup>                                 | 131 W h kg <sup>-1</sup>    | 62.5 kW kg <sup>-1</sup>  | 85% after 1000 cycles           | 114 |
| PANI@C and PPy@C nanowires               | 189.73 F g <sup>-1</sup> and 114.08 F g <sup>-1</sup> |                             |                           | 95% and 85% after 10000 cycles. | 115 |
| TiO <sub>2</sub> @PPy nanowires          | 64.6 mF cm <sup>-2</sup> at 10 mV s <sup>-1</sup>     | 0.013 mW h cm <sup>-3</sup> |                           | 91.7% after 2000 cycles         | 44  |

**Other materials**

|                                                  |                                              |                          |                          |                         |     |
|--------------------------------------------------|----------------------------------------------|--------------------------|--------------------------|-------------------------|-----|
| 1D silver nanowires                              | 213 F g <sup>-1</sup>                        | 4.5 W h kg <sup>-1</sup> | 5.04 kW kg <sup>-1</sup> | >90% after 10000 cycles | 23  |
| Three-dimensional hierarchical GeSe <sub>2</sub> | 300 F g <sup>-1</sup> at 1 A g <sup>-1</sup> |                          |                          | 99.3% after 2000 cycles | 116 |

---



**Table S2.** Comparison of electrochemical performances and flexibilities of the reported 1D nanomaterial-based flexible supercapacitors

| Structure                                                         | Capacity                                          | Energy density                        | Power density            | Cyclic stability                    | Flexibility              | Ref |
|-------------------------------------------------------------------|---------------------------------------------------|---------------------------------------|--------------------------|-------------------------------------|--------------------------|-----|
| <b>Sandwich-type flexible SCs</b>                                 |                                                   |                                       |                          |                                     |                          |     |
| SWCNT//SWCNT                                                      | 120 F g <sup>-1</sup>                             | 6 W h kg <sup>-1</sup>                | 70 kW kg <sup>-1</sup>   |                                     | Printable                | 12  |
| Symmetric MnO <sub>2</sub> nanorods/carbon nanoparticles SC       |                                                   | 4.8 W h kg <sup>-1</sup>              | 14 kW kg <sup>-1</sup>   | 97.3% after 10000 cycles            | Bendable                 | 77  |
| H-TiO <sub>2</sub> @MnO <sub>2</sub> //H-TiO <sub>2</sub> @C      | 139.6 F g <sup>-1</sup>                           | 59 W h kg <sup>-1</sup>               | 45 kW kg <sup>-1</sup>   | 91.2% after 5000 cycles             | Bendable and twistable   | 74  |
| PANI/(WO <sub>3-x</sub> /MoO <sub>3-x</sub> core/shell nanowires) | 216 mF cm <sup>-2</sup> ,                         | 0.0019 W h cm <sup>-3</sup>           | 0.73 W cm <sup>-3</sup>  | 75% after 10000 cycles              |                          | 73  |
| VO <sub>x</sub> nanowires//VN nanowires                           | 1.35F cm <sup>-3</sup>                            | 0.61 mW h cm <sup>-3</sup>            | 0.85 W cm <sup>-3</sup>  | 87.5% after 10000 cycles            | Bendable                 | 103 |
| <b>Wire-shaped flexible SCs</b>                                   |                                                   |                                       |                          |                                     |                          |     |
| ZnO nanowire-fiber                                                | 2.4 mF cm <sup>-2</sup> at 100 mV s <sup>-1</sup> | 10 <sup>-4</sup> W h cm <sup>-2</sup> | 0.1 W cm <sup>-2</sup>   |                                     |                          | 13  |
| Ni(OH) <sub>2</sub> nanowires //mesoporous carbon                 | 35.67 mF cm <sup>-2</sup>                         | 0.01 mW h cm <sup>-2</sup>            | 7.3 mW cm <sup>-2</sup>  | 70% after 10000 cycles              | Bendable                 | 71  |
| Twisted CNT fibers                                                | 13.31 F g <sup>-1</sup>                           | 92.84 mW h cm <sup>-3</sup> (Max.)    | 3.87 W cm <sup>-3</sup>  | 97% after 1000 cycles               |                          | 118 |
| Biscrolled yarn                                                   | 179 F cm <sup>-3</sup>                            | 1.4 mW h cm <sup>-3</sup>             | 40 W cm <sup>-3</sup>    | 99% after 10000 cycles              | knittable                | 119 |
| CNT yarns dotted with Co <sub>3</sub> O <sub>4</sub>              | 52.6 mF cm <sup>-2</sup>                          | 1.10 μWh cm <sup>-2</sup>             | 0.01 mW cm <sup>-2</sup> | 96% after 1000 cycles               | Bendable                 | 120 |
| PANI coated CNT yarns                                             | 38 mF cm <sup>-2</sup>                            |                                       |                          | 91% after 800 cycles                | Bendable                 | 30  |
| Coaxial CNT fiber SCs                                             | 59 F g <sup>-1</sup>                              | 1.88 W h kg <sup>-1</sup>             | 755.9 W kg <sup>-1</sup> | No obvious decay after 11000 cycles | Bendable and knittable   | 121 |
| Stretchable CNT fiber SCs                                         | 20 F g <sup>-1</sup>                              | 0.363 Wh kg <sup>-1</sup>             | 421 W kg <sup>-1</sup>   | 90% after 1000 cycles               | Bendable and stretchable | 122 |
| Electrochromic PANI coated CNT fiber SCs                          | 255.5 F g <sup>-1</sup>                           | 12.75 Wh kg <sup>-1</sup>             | 1494 W kg <sup>-1</sup>  | 93.8% after 1000 cycles             | Bendable and stretchable | 123 |
| Stretchable CNT fiber SCs (per-stretched)                         | 30.7 F g <sup>-1</sup>                            |                                       |                          | 99% after 1000 cycles               | Stretchable              | 124 |
| Superelastic CNT fiber SCs                                        | 105.8 F g <sup>-1</sup> at 1 A g <sup>-1</sup>    |                                       |                          | 90% after 2000 cycles               | Bendable and stretchable | 125 |

---

**Chip-type Flexible SCs**

|                                            |                                                      |                                           |                                   |                         |          |     |
|--------------------------------------------|------------------------------------------------------|-------------------------------------------|-----------------------------------|-------------------------|----------|-----|
| PANI nanorods on RGO patterns              | 970 F g <sup>-1</sup><br>at 2.5 A g <sup>-1</sup>    |                                           |                                   | 90% after 1700 cycles   |          | 110 |
| Nano-porous gold/manganese oxide nanowires |                                                      | 55 μW h cm <sup>-3</sup>                  | 3.4 W cm <sup>-3</sup>            | 81% after 10000 cycles  |          | 130 |
| 3D graphene/CNT carpet                     | 3.93 mF cm <sup>-2</sup>                             | 2.42 mWh cm <sup>-3</sup>                 | 115 W cm <sup>-3</sup><br>(Max.)  | 98.4% after 8000 cycles |          | 131 |
| PANI nanowires                             | 588 F cm <sup>-3</sup>                               | 82 mWh cm <sup>-3</sup>                   | 1250 W cm <sup>-3</sup><br>(Max.) | 96% after 1000 cycles   | Bendable | 132 |
| Carbon/MnO <sub>2</sub> core/shell fibers  | 2.5 F cm <sup>-3</sup><br>at 0.02 A cm <sup>-3</sup> | 2.2×10 <sup>-4</sup> W h cm <sup>-3</sup> | 0.4 W cm <sup>-3</sup>            | 84% after 10000 cycles  | Bendable | 15  |
| Planar-integrated fiber SCs                | 650 mF g <sup>-1</sup>                               |                                           |                                   | 94% after 1000 cycles   | Bendable | 133 |

---
